# Supplementary material for: Artificial selection on GmOLEO1 contributes to the increase in seed oil during soybean domestication
Source: PLoS Genet. 2019 Jul 10;15(7):e1008267. doi: 10.1371/journal.pgen.1008267 (PMC6645561; doi:10.1371/journal.pgen.1008267)
Supplement: S1 Table — (XLSX) [file pgen.1008267.s006.xlsx]

## Sheet: S1 Table
Table S1 Phenotypic variation analysis for oil content of the 219 accessions in six different environments.
	E1	E2	E3	E4	E5	E6	BLUP
Mean (%)	18.9713	18.5004	18.586	18.2592	18.0985	18.7558	18.698
SD	2.73519	1.76309	1.84548	2.24488	2.30041	2.62127	1.69106
Min (%)	10.72	14.7	12.28	12.89	13.4	9.64	13.6638
Max (%)	27.69	27.02	24.55	24.07	24.02	25.03	23.4966
Kurt	1.38805	2.0928	1.4744	-0.0224307	-0.118738	0.909704	0.517596
Skew	0.446304	0.693862	0.499136	0.415158	0.547337	0.0501353	0.490334
CV	0.144175	0.0953002	0.0992939	0.122945	0.127105	0.139758	0.0904408
ANOVA	PG=1.3 ╳ 10-128, PE=1.23 ╳ 10-6
